# Supplementary material
Source: PubMed Central journal article supplement (PMC2839295)

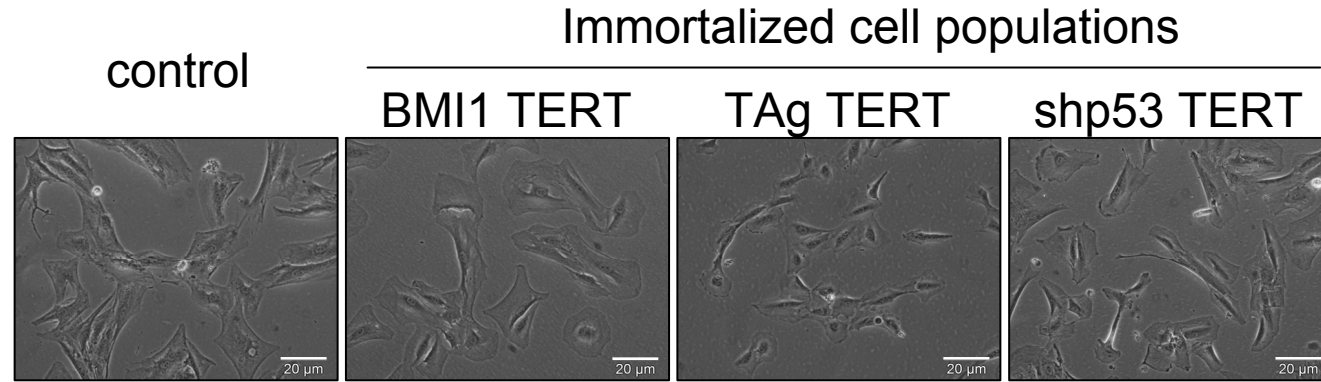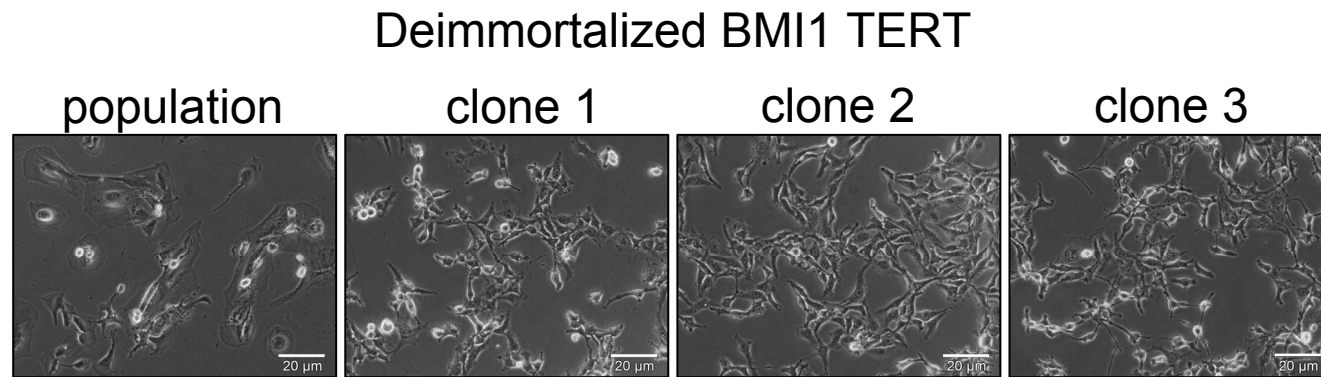

Supplement: mt2009268x1.pdf [file mt2009268x1.pdf]

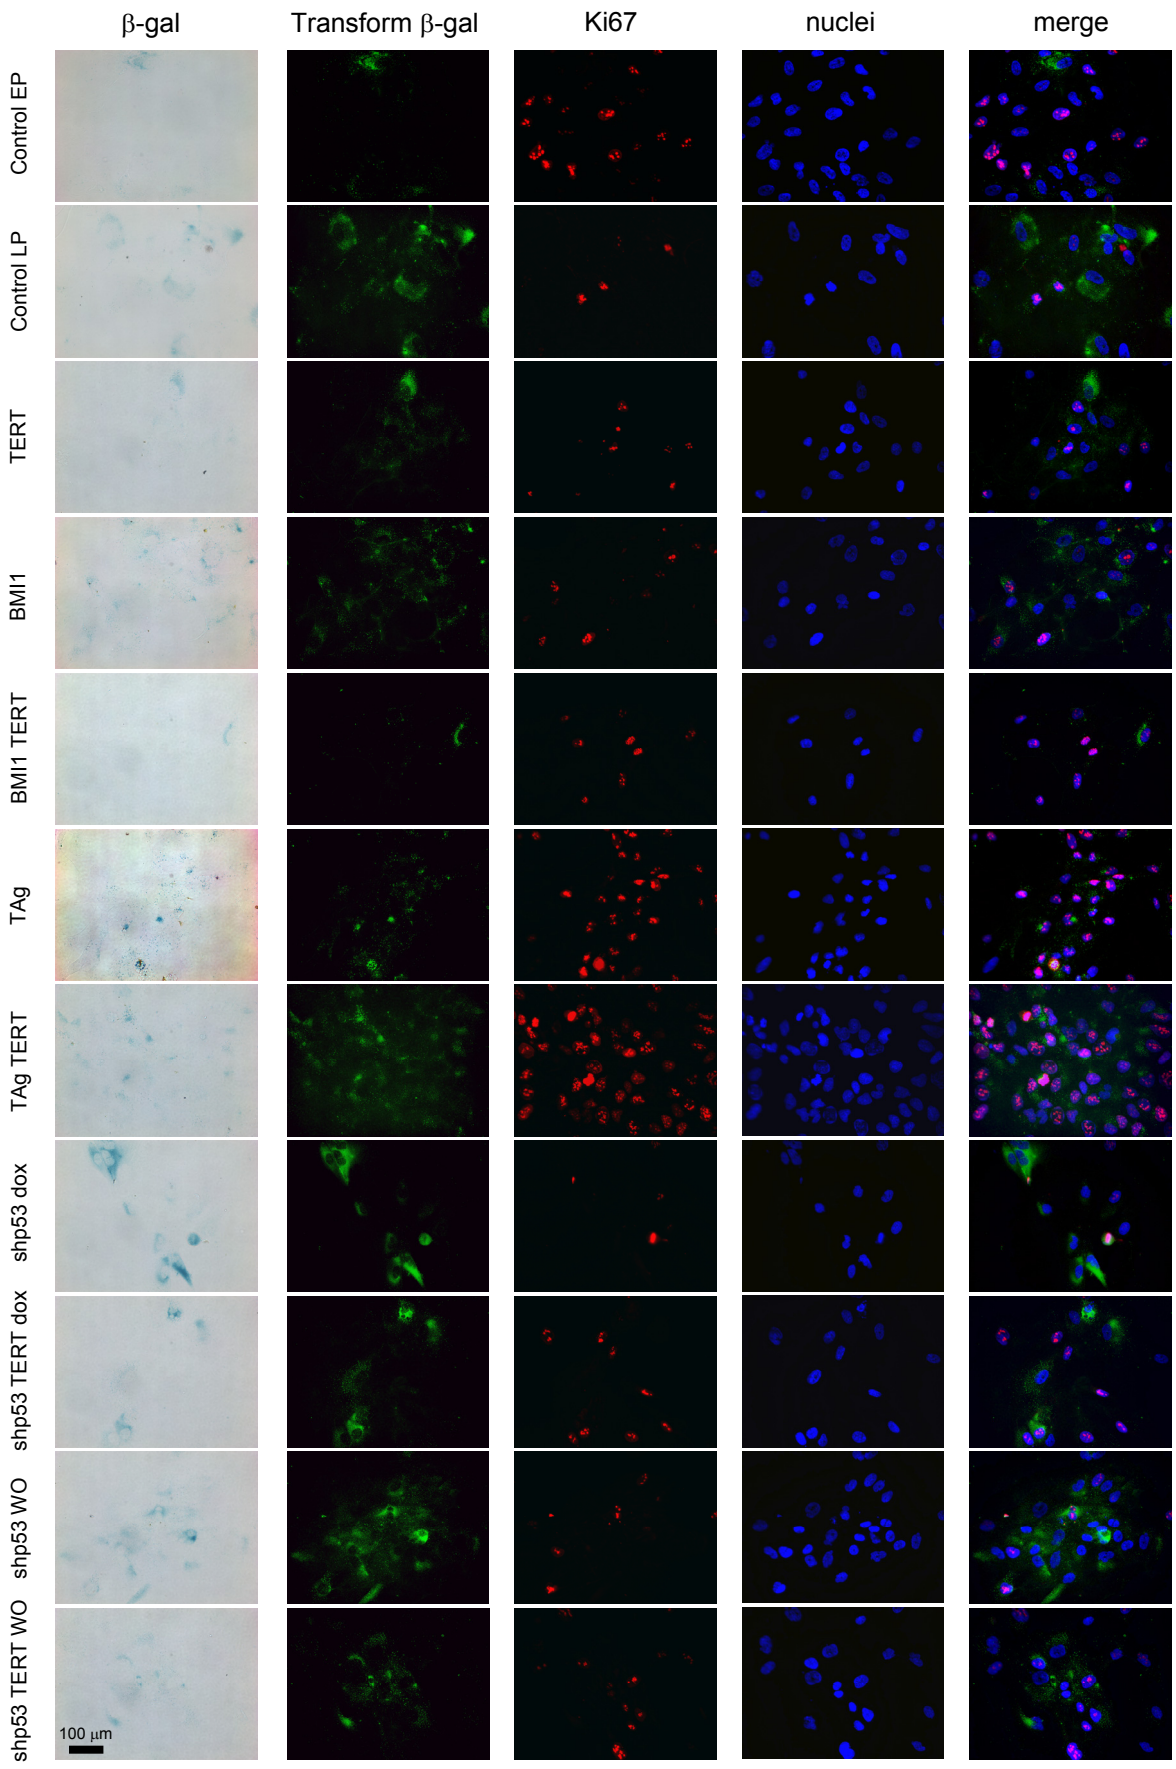

Supplement: mt2009268x2.pdf [file mt2009268x2.pdf]

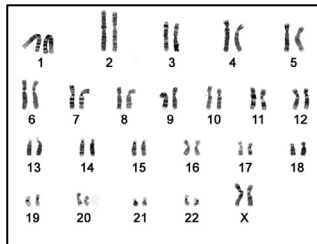

control

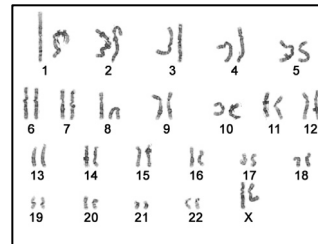

BMI1 TERT

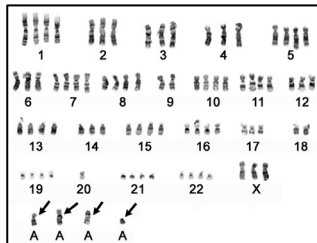

TAg TERT

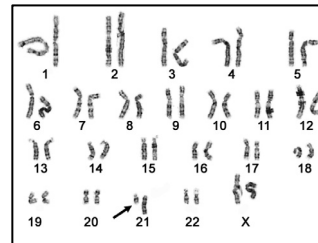

shp53 TERT

Supplement: mt2009268x3.pdf [file mt2009268x3.pdf]

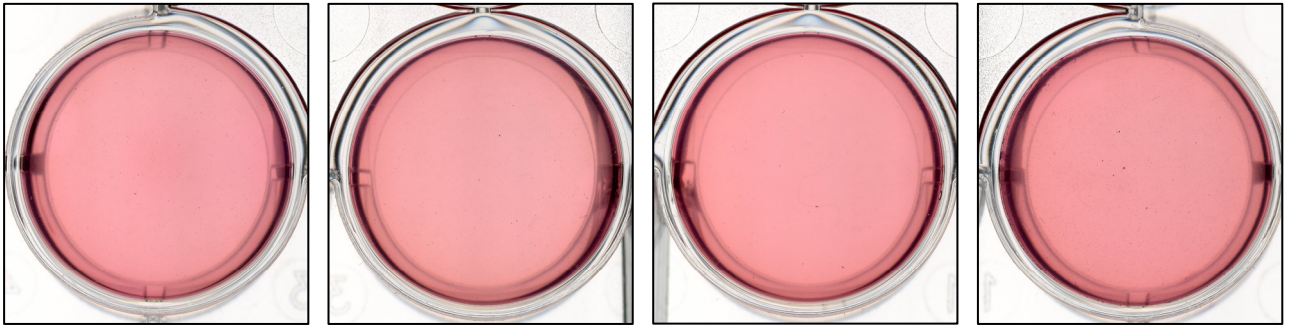

control

BMI1

TAg

shp53

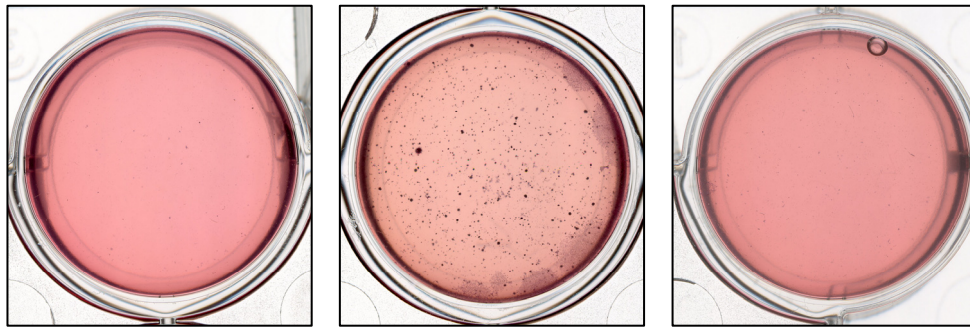

BMI1 TERT

TAg TERT

shp53 TERT

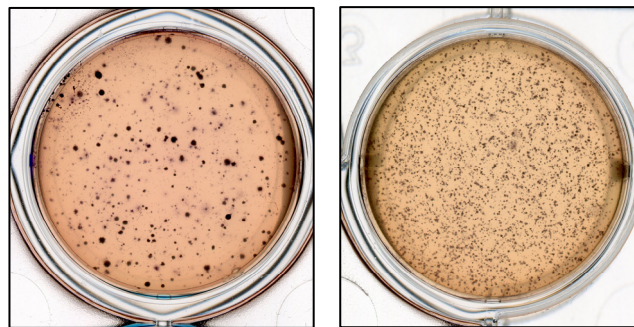

MDA-MB

U-87MG

tumorigenic  
controls

Supplement: mt2009268x4.pdf [file mt2009268x4.pdf]

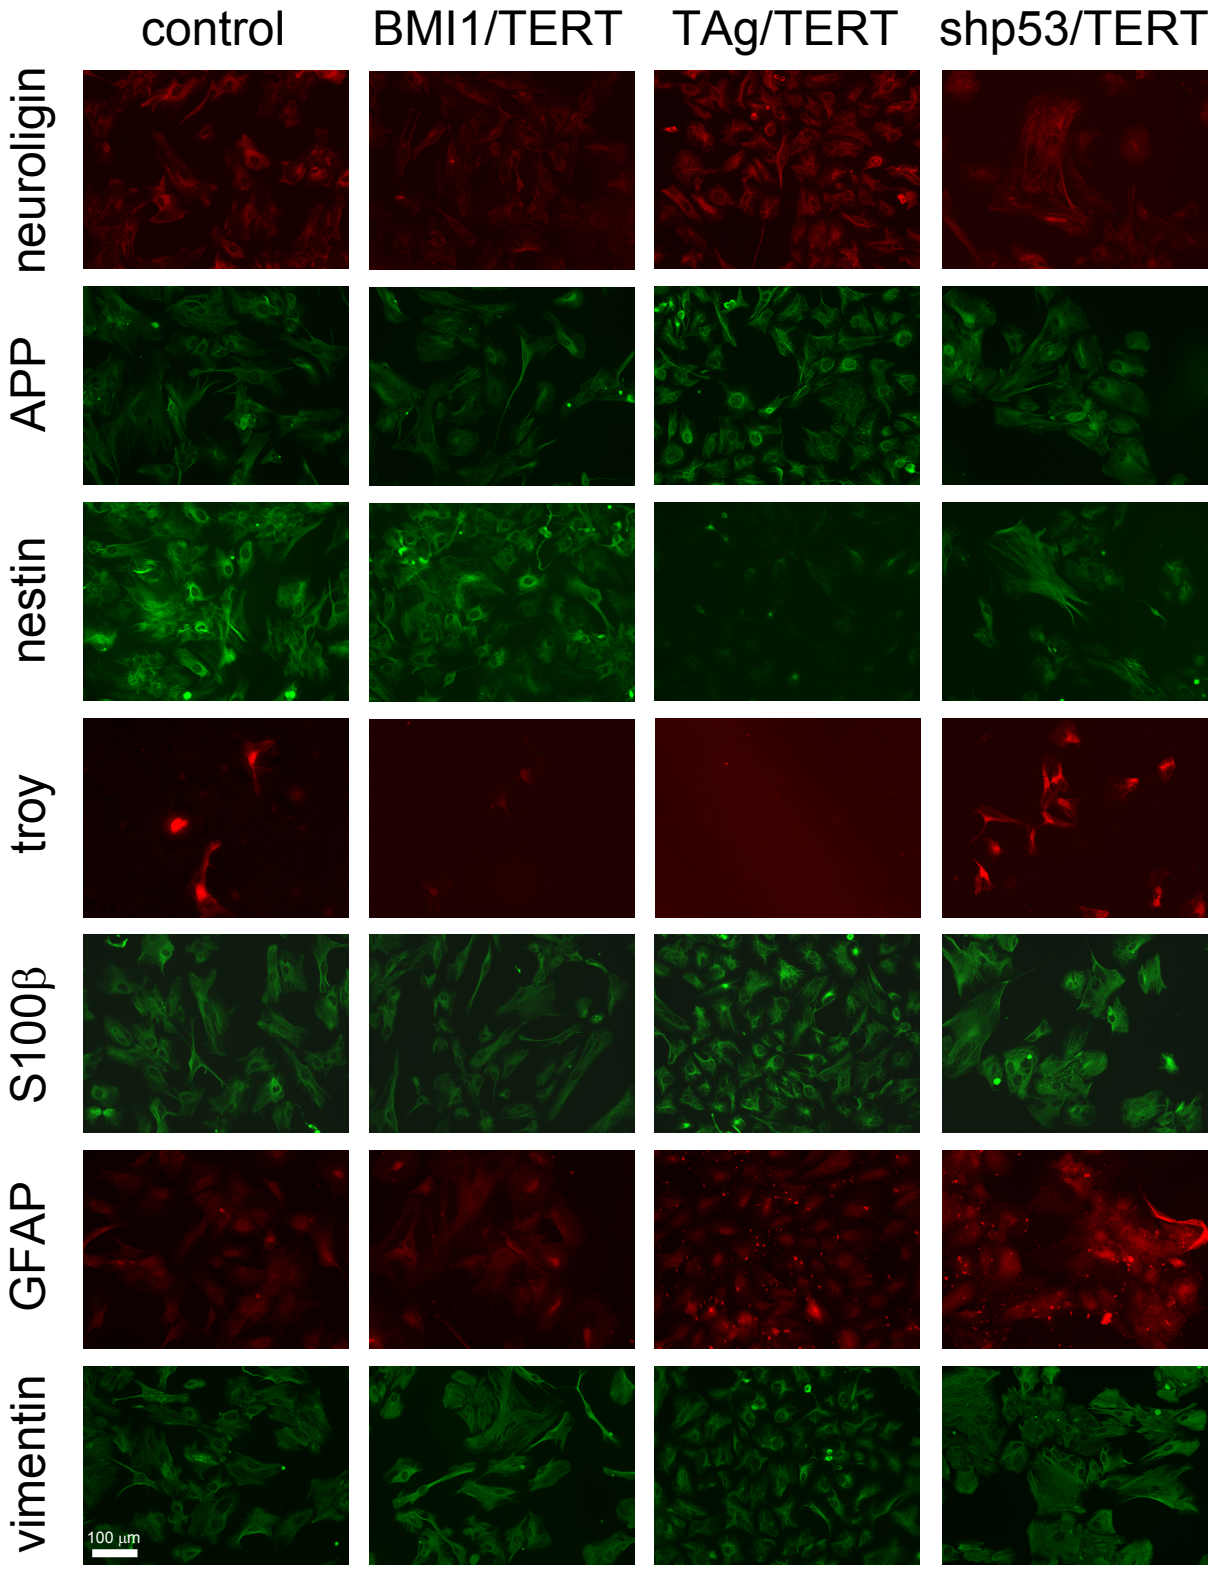

Supplement: mt2009268x5.pdf [file mt2009268x5.pdf]

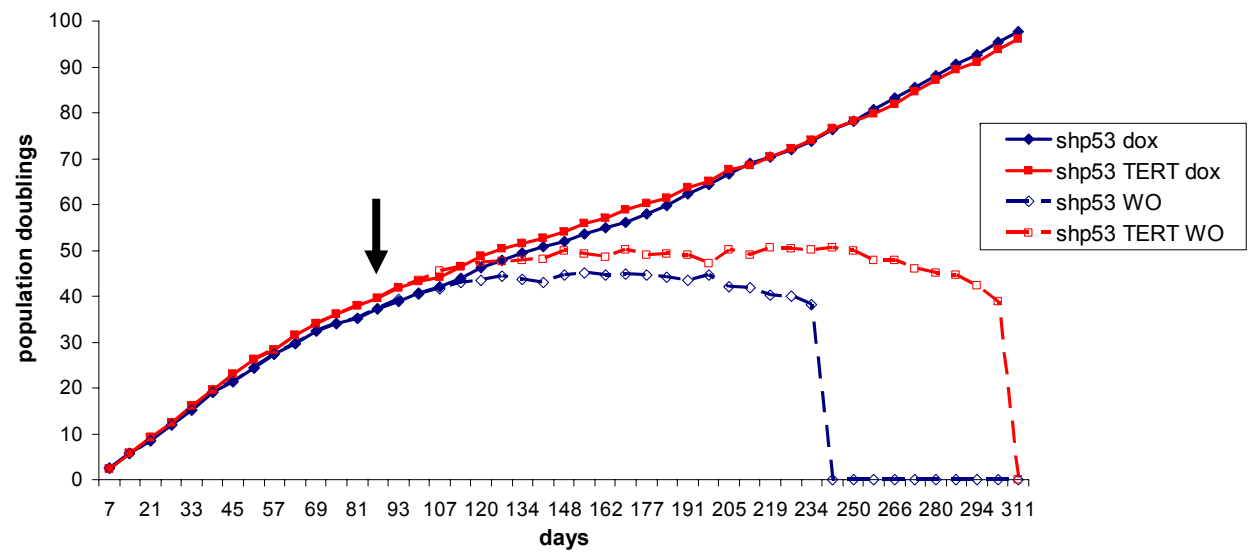

Supplement: mt2009268x6.pdf [file mt2009268x6.pdf]
